# Supplementary material
Source: PubMed Central journal article supplement (PMC4640993)
Supplement: NIHMS709948-supplement-1.pdf [file NIHMS709948-supplement-1.pdf]

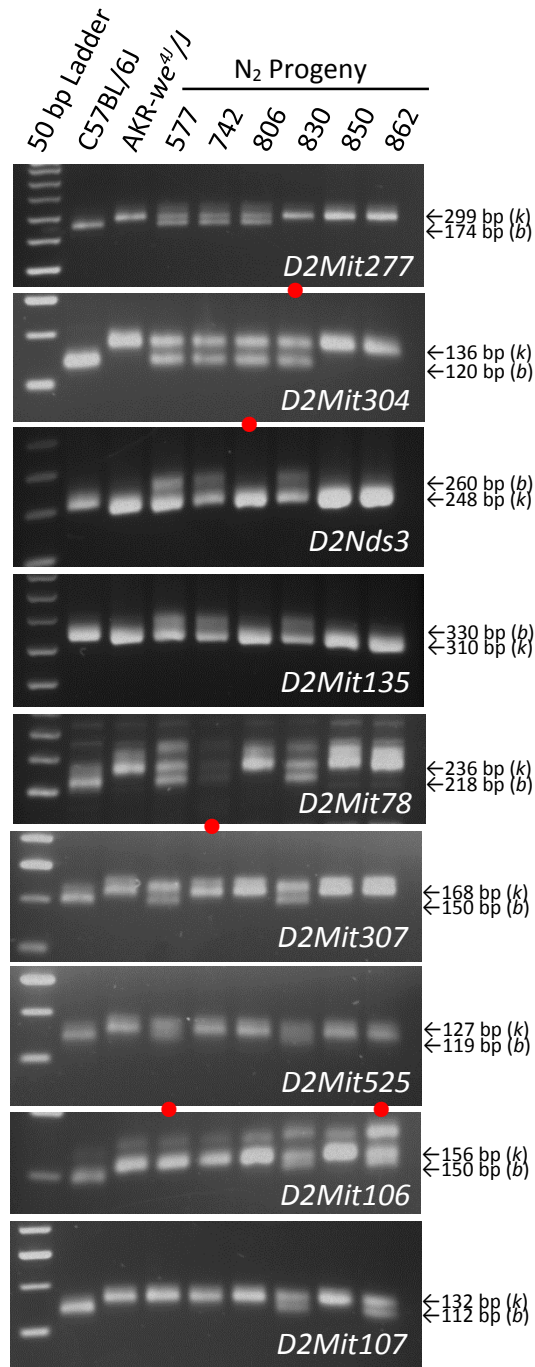

**Figure S1.** Dimorphic amplimers for each of nine microsatellite DNA markers used in this study. Panels are arranged (from top to bottom) in their order (from centromere to telomere) on Chr 2. Heterozygous mice received a strain C57BL/6J-derived allele (*b*) from their F<sub>1</sub> hybrid mother; homozygotes received an AKR/J-derived allele (*k*) from their mother. The mutant testcross father always transmitted the AKR-derived allele. Except for animal number 850, each of the N<sub>2</sub> mice shown here is a recombinant, having had a crossover (indicated by a red dot) between *D2Mit277* and *D2Mit107*.
