# Supplementary material
Source: PubMed Central journal article supplement (PMC4640993)
Supplement: NIHMS709948-supplement-4.pdf [file NIHMS709948-supplement-4.pdf]

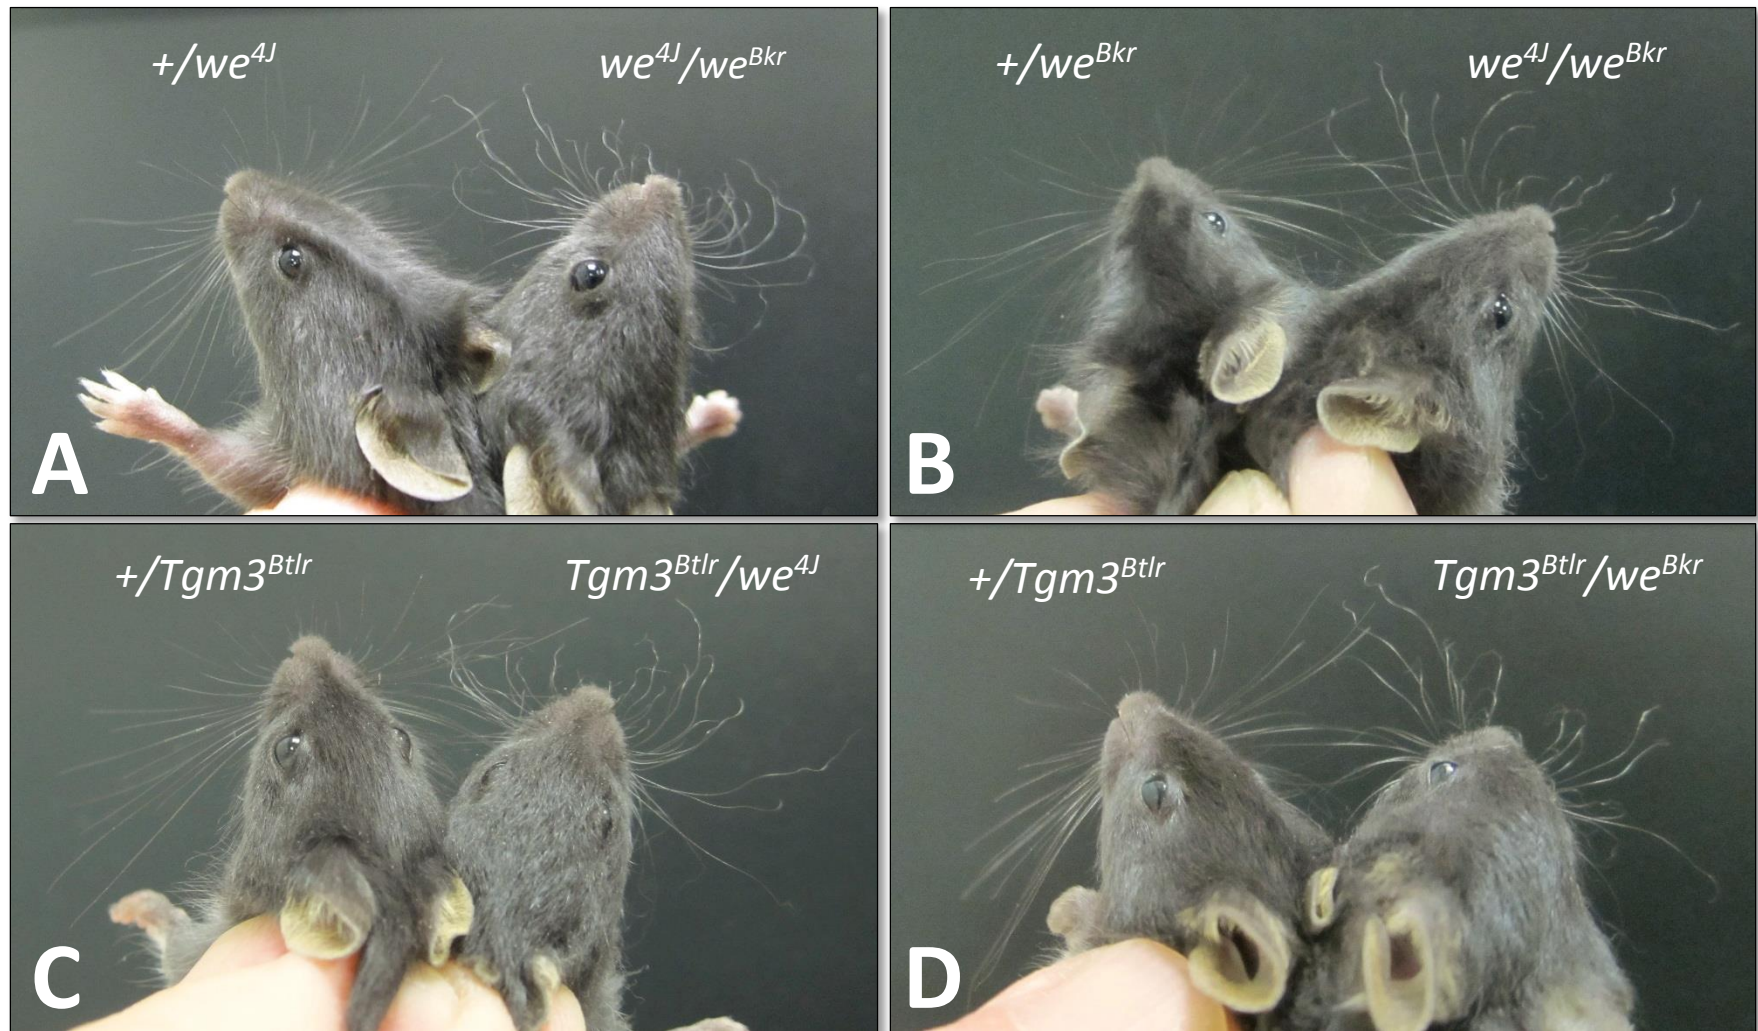

**Figure S4.** Representative wild type and mutant pups from complementation testing among the recessive  $we^{Bkr}$ ,  $we^{4J}$  and  $Tgm3^{Btlr}$  mutations. The mice in panels A-D were produced in the four respective crosses, A-D, described in Table 1. Mice shown (wild type heterozygotes on the left, non-complementing compound heterozygotes on the right) were photographed at 20 days of age. Mutant phenotypes shown in **A** and **B** formally confirm that  $we^{Bkr}$  and  $we^{4J}$  are alleles of each other, as well as being alleles of the original  $we$  mutation, which was previously demonstrated by Graff et al. 1986 (ref. 2) for  $we^{Bkr}$  and by Samples et al. 2002 (ref. 4) for  $we^{4J}$ . Mutant phenotypes shown in **C** and **D** demonstrate that these recessive wellhaarig mutations fail to complement  $Tgm3^{Btlr}$ , and may therefore be considered alleles of  $Tgm3$ . The genotypes of all progeny from these crosses were verified using the DNA tests described in Figure 3.
