# Supplementary material
Source: PubMed Central journal article supplement (PMC4640993)
Supplement: NIHMS709948-supplement-7.pdf [file NIHMS709948-supplement-7.pdf]

**Table S2.** Location of SNP markers referred to in the Brennan *et al.* (2015) text.

| Designation in Brennan <i>et al.</i> 2015 | Official Designation                                                                  | Position (GRCm Build 38.p3)                                 | 5' Flanking Gene      | 3' Flanking Gene      |
|-------------------------------------------|---------------------------------------------------------------------------------------|-------------------------------------------------------------|-----------------------|-----------------------|
| SNP A                                     | <i>rs27411393</i>                                                                     | 2:128884370                                                 | <i>Fbln7</i> : Intron | <i>Fbln7</i> : Intron |
| SNP B                                     | <i>rs27433588</i> ,<br><i>rs6384399</i> ,<br><i>rs6384488</i> ,<br><i>rs235460543</i> | 2:129150553,<br>2:129150604,<br>2:129150639,<br>2:129150662 | <i>Chchd5</i>         | <i>Al847159</i>       |
| SNP C                                     | <i>rs3654481</i> ,<br><i>rs3654530</i>                                                | 2:129938405,<br>2:129938428                                 | <i>Stk35</i>          | <i>Tgm3</i>           |
| SNP D                                     | <i>rs27242445</i>                                                                     | 2:130224982                                                 | <i>Tmc2</i> : Intron  | <i>Tmc2</i> : Intron  |

Official designations and base-pair positions on mouse Chromosome 2 are from GRCm38.p3. These data were accessed through the ensembl Mouse Genome Browser (EMGB), [http://ensembl.org/Mus\\_musculus](http://ensembl.org/Mus_musculus), Release 78 (May 2015)(ref. 9).
